# Supplementary material for: Clinical Outcomes Associated With Overestimation of Oxygen Saturation by Pulse Oximetry in Patients Hospitalized With COVID-19
Source: PubMed Central journal article supplement (PMC10450566; doi:10.1001/jamanetworkopen.2023.30856), 2023-08-24
Supplement: jamanetwopen-e2330856-s001.pdf [file jamanetwopen-e2330856-s001.pdf]

## Supplemental Online Content

Fawzy A, Wu TD, Wang K, et al. Clinical outcomes associated with overestimation of oxygen saturation by pulse oximetry in patients hospitalized with COVID-19. *JAMA Netw Open*. 2023;6(8):e2330856. doi:10.1001/jamanetworkopen.2023.30856

**eTable 1.** Baseline Characteristics Comparing Individuals Admitted With COVID-19 With at Least One SaO<sub>2</sub> Measured to the Analytic Samples Used Throughout the Study

**eTable 2.** Baseline Characteristics by Race and Ethnicity of Patients Hospitalized in the HCA Healthcare System for COVID-19 With at Least One Concurrent Pair of SaO<sub>2</sub> and SpO<sub>2</sub> Measurements Within 10 Minutes

**eFigure.** Difference Between Arterial Oxygen Saturation and Pulse Oximetry (SaO<sub>2</sub> – SpO<sub>2</sub>) by Race and Ethnicity Stratified by SpO<sub>2</sub>

**eTable 3.** Results of the Linear Mixed Model Investigating the Association Between Race and Pulse Oximeter Accuracy

**eTable 4.** Results of Linear Mixed Models for the Association of Unrecognized Need for COVID-19 Therapy With Time to COVID-19 Therapy and Readmissions

This supplemental material has been provided by the authors to give readers additional information about their work.

**eTable 1.** Baseline characteristics comparing individuals admitted with COVID-19 with at least one SaO<sub>2</sub> measured (N=40,738) to the analytic samples used throughout the study to investigate: (1) the association of race with pulse oximeter accuracy (N=24,504), (2) the association between race and unrecognized need for COVID-19 therapy (N=15,960), and (3) the association between unrecognized need for COVID-19 therapy and clinical outcomes (N= 3,566)

| <b>Characteristic [mean ± SD or N (%) unless otherwise specified]</b> | <b>At least one SaO<sub>2</sub> measured (N = 40,738)</b> | <b>At least one concurrent SaO<sub>2</sub> and SpO<sub>2</sub> measurement within ± 10 minutes (N = 24,504)</b> | <b>At least one SaO<sub>2</sub> measured, admission SpO<sub>2</sub> ≥94% without supplement oxygen, admitted after July 1, 2020 (N = 15,960)</b> | <b>At least one concurrent SpO<sub>2</sub>-SaO<sub>2</sub> pair, admission SpO<sub>2</sub> ≥94% without supplement oxygen, admitted after July 1, 2020 (N = 8,635)</b> | <b>At least one concurrent SpO<sub>2</sub>-SaO<sub>2</sub> pair, first SaO<sub>2</sub> &lt;94%, admitted after July 1, 2020 (N= 3,566)</b> |
|-----------------------------------------------------------------------|-----------------------------------------------------------|-----------------------------------------------------------------------------------------------------------------|--------------------------------------------------------------------------------------------------------------------------------------------------|------------------------------------------------------------------------------------------------------------------------------------------------------------------------|--------------------------------------------------------------------------------------------------------------------------------------------|
| Age (years)                                                           | 63.8 (16.5)                                               | 63.9 (15.8)                                                                                                     | 64.9 (17.2)                                                                                                                                      | 65.1 (16.5)                                                                                                                                                            | 65.4 (15.8)                                                                                                                                |
| Female                                                                | 17772 (43.6%)                                             | 10263 (41.9%)                                                                                                   | 7468 (46.8%)                                                                                                                                     | 3875 (44.9%)                                                                                                                                                           | 1598 (44.8%)                                                                                                                               |
| Race                                                                  |                                                           |                                                                                                                 |                                                                                                                                                  |                                                                                                                                                                        |                                                                                                                                            |
| Black                                                                 | 7142 (17.5%)                                              | 3922 (16.0%)                                                                                                    | 3201 (20.1%)                                                                                                                                     | 1569 (18.2%)                                                                                                                                                           | 662 (18.6%)                                                                                                                                |
| Hispanic                                                              | 12903 (31.7%)                                             | 7895 (32.2%)                                                                                                    | 4358 (27.3%)                                                                                                                                     | 2349 (27.2%)                                                                                                                                                           | 1027 (28.8%)                                                                                                                               |
| Other                                                                 | 3837 (9.4%)                                               | 2554 (10.4%)                                                                                                    | 1430 (9.0%)                                                                                                                                      | 885 (10.2%)                                                                                                                                                            | 355 (10.0%)                                                                                                                                |
| White                                                                 | 16856 (41.4%)                                             | 10133 (41.4%)                                                                                                   | 6971 (43.7%)                                                                                                                                     | 3832 (44.4%)                                                                                                                                                           | 1522 (42.7%)                                                                                                                               |
| BMI                                                                   |                                                           |                                                                                                                 |                                                                                                                                                  |                                                                                                                                                                        |                                                                                                                                            |
| <18.5                                                                 | 668 (1.6%)                                                | 382 (1.6%)                                                                                                      | 334 (2.1%)                                                                                                                                       | 174 (2.0%)                                                                                                                                                             | 54 (1.5%)                                                                                                                                  |
| 18.5 to <30                                                           | 17165 (42.1%)                                             | 9974 (40.7%)                                                                                                    | 7188 (45.0%)                                                                                                                                     | 3757 (43.5%)                                                                                                                                                           | 1459 (40.9%)                                                                                                                               |
| ≥ 30                                                                  | 17308 (42.5%)                                             | 10907 (44.5%)                                                                                                   | 6028 (37.8%)                                                                                                                                     | 3406 (39.4%)                                                                                                                                                           | 1566 (43.9%)                                                                                                                               |
| CCI                                                                   |                                                           |                                                                                                                 |                                                                                                                                                  |                                                                                                                                                                        |                                                                                                                                            |
| 0                                                                     | 8444 (20.7%)                                              | 4616 (18.8%)                                                                                                    | 2818 (17.7%)                                                                                                                                     | 1200 (13.9%)                                                                                                                                                           | 442 (12.4%)                                                                                                                                |
| 1-4                                                                   | 21451 (52.7%)                                             | 12789 (53.1%)                                                                                                   | 7935 (49.7%)                                                                                                                                     | 4242 (49.1%)                                                                                                                                                           | 1801 (50.5%)                                                                                                                               |
| ≥ 5                                                                   | 10843 (26.6%)                                             | 7099 (29.5%)                                                                                                    | 5207 (32.6%)                                                                                                                                     | 3193 (37.0%)                                                                                                                                                           | 1323 (37.1%)                                                                                                                               |
| Current Smoker                                                        | 2173 (5.3%)                                               | 1252 (5.1%)                                                                                                     | 980 (6.1%)                                                                                                                                       | 501 (5.8%)                                                                                                                                                             | 171 (4.8%)                                                                                                                                 |

| <b>Characteristic [mean ± SD or N (%) unless otherwise specified]</b> | <b>At least one SaO<sub>2</sub> measured (N = 40,738)</b> | <b>At least one concurrent SaO<sub>2</sub> and SpO<sub>2</sub> measurement within ± 10 minutes (N = 24,504)</b> | <b>At least one SaO<sub>2</sub> measured, admission SpO<sub>2</sub> ≥94% without supplement oxygen, admitted after July 1, 2020 (N = 15,960)</b> | <b>At least one concurrent SpO<sub>2</sub>-SaO<sub>2</sub> pair, admission SpO<sub>2</sub> ≥94% without supplement oxygen, admitted after July 1, 2020 (N = 8,635)</b> | <b>At least one concurrent SpO<sub>2</sub>-SaO<sub>2</sub> pair, first SaO<sub>2</sub> &lt;94%, admitted after July 1, 2020 (N= 3,566)</b> |
|-----------------------------------------------------------------------|-----------------------------------------------------------|-----------------------------------------------------------------------------------------------------------------|--------------------------------------------------------------------------------------------------------------------------------------------------|------------------------------------------------------------------------------------------------------------------------------------------------------------------------|--------------------------------------------------------------------------------------------------------------------------------------------|
| Diabetes                                                              | 20471 (50.3%)                                             | 12927 (52.8%)                                                                                                   | 8276 (51.9%)                                                                                                                                     | 4791 (55.5%)                                                                                                                                                           | 2081 (58.4%)                                                                                                                               |
| COPD                                                                  | 11308 (27.8%)                                             | 7137 (29.1%)                                                                                                    | 4789 (30.0%)                                                                                                                                     | 2624 (30.4%)                                                                                                                                                           | 1046 (29.3%)                                                                                                                               |
| PVD                                                                   | 3954 (9.7%)                                               | 2870 (11.7%)                                                                                                    | 2004 (12.6%)                                                                                                                                     | 1178 (13.6%)                                                                                                                                                           | 478 (13.4%)                                                                                                                                |
| CKD                                                                   | 11414 (28.0%)                                             | 7918 (32.3%)                                                                                                    | 5240 (32.8%)                                                                                                                                     | 3186 (36.9%)                                                                                                                                                           | 1379 (38.7%)                                                                                                                               |
| WHO                                                                   |                                                           |                                                                                                                 |                                                                                                                                                  |                                                                                                                                                                        |                                                                                                                                            |
| 2                                                                     | 6171 (15.1%)                                              | 2638 (10.8%)                                                                                                    | 3948 (24.7%)                                                                                                                                     | 1625 (18.8%)                                                                                                                                                           | 644 (18.1%)                                                                                                                                |
| 3                                                                     | 18918 (46.4%)                                             | 9457 (38.6%)                                                                                                    | 7340 (46.0%)                                                                                                                                     | 3421 (39.6%)                                                                                                                                                           | 1582 (44.4%)                                                                                                                               |
| 4                                                                     | 5924 (14.5%)                                              | 4174 (17.0%)                                                                                                    | 1380 (8.6%)                                                                                                                                      | 930 (10.8%)                                                                                                                                                            | 470 (13.2%)                                                                                                                                |
| 5                                                                     | 5604 (13.8%)                                              | 4343 (17.7%)                                                                                                    | 1693 (10.6%)                                                                                                                                     | 1212 (14.0%)                                                                                                                                                           | 483 (13.5%)                                                                                                                                |
| 6                                                                     | 4121 (10.1%)                                              | 3846 (15.7%)                                                                                                    | 1599 (10.0%)                                                                                                                                     | 1447 (16.8%)                                                                                                                                                           | 387 (10.9%)                                                                                                                                |
| SpO <sub>2</sub> (%)                                                  | 93.6 (6.5)                                                | 93.7 (6.4)                                                                                                      | 94.7 (6.2)                                                                                                                                       | 94.7 (6.2)                                                                                                                                                             | 92.0 (6.9)                                                                                                                                 |
| Temperature (°C)                                                      | 37.4 (0.8)                                                | 37.4 (0.8)                                                                                                      | 37.3 (0.8)                                                                                                                                       | 37.3 (0.8)                                                                                                                                                             | 37.3 (0.8)                                                                                                                                 |
| Mean Arterial Pressure (mmHg)                                         | 87.5 (17.2)                                               | 87.5 (17.2)                                                                                                     | 87.6 (18.5)                                                                                                                                      | 87.6 (18.5)                                                                                                                                                            | 87.9 (19.5)                                                                                                                                |
| Creatinine (mg/dL)                                                    | 1.6 (1.8)                                                 | 1.6 (1.8)                                                                                                       | 1.9 (2.1)                                                                                                                                        | 1.9 (2.1)                                                                                                                                                              | 1.8 (2.0)                                                                                                                                  |
| Hemoglobin (g/dL)                                                     | 12.3 (2.5)                                                | 12.4 (2.5)                                                                                                      | 11.8 (2.6)                                                                                                                                       | 11.8 (2.6)                                                                                                                                                             | 11.9 (2.5)                                                                                                                                 |
| Total Bilirubin (mg/dL)                                               | 0.77 (1.0)                                                | 0.77 (1.0)                                                                                                      | 0.80 (1.3)                                                                                                                                       | 0.80 (1.3)                                                                                                                                                             | 0.8 (1.5)                                                                                                                                  |
| Time (hours) to first SaO <sub>2</sub>                                | 5.9 (1.2 – 54.7)                                          | 6.1 (1.1 – 59.7)                                                                                                | 6.9 (1.4 – 65.5)                                                                                                                                 | 7.9 (1.3 – 74.3)                                                                                                                                                       | 19.1 (1.7 – 101.1)                                                                                                                         |
| LOS (days; median [IQR])                                              | 10.0 (5.2 – 17.7)                                         | 13.2 (7.0 – 22.2)                                                                                               | 8.6 (4.4 – 16.1)                                                                                                                                 | 12.1 (6.0 – 20.4)                                                                                                                                                      | 13.3 (7.3 – 21.5)                                                                                                                          |
| Died during hospitalization                                           | 14568 (35.8%)                                             | 12267 (50.1%)                                                                                                   | 5060 (31.7%)                                                                                                                                     | 4012 (46.5%)                                                                                                                                                           | 1927 (54.0%)                                                                                                                               |

**eTable 2.** Baseline characteristics by race/ethnicity of patients hospitalized in the HCA Healthcare system for COVID-19 with at least one concurrent pair of SaO<sub>2</sub> and SpO<sub>2</sub> measurements within ± 10 minutes

| Characteristic [mean ± SD or N (%) unless otherwise specified] | White, non-Hispanic (N = 10133) | Black (N = 3922) | Hispanic (N = 7895) | Other (N = 2554) |
|----------------------------------------------------------------|---------------------------------|------------------|---------------------|------------------|
| Age (years)                                                    | 67.5 (14.6)                     | 61.5 (15.8)      | 60.9 (16.3)         | 62.5 (15.7)      |
| Female                                                         | 4134 (40.8%)                    | 2009 (51.2%)     | 3158 (40.0%)        | 962 (37.7%)      |
| BMI                                                            |                                 |                  |                     |                  |
| <18.5                                                          | 195 (1.9%)                      | 69 (1.8%)        | 62 (0.8%)           | 56 (2.2%)        |
| 18.5 to <30                                                    | 4170 (41.2%)                    | 1427 (36.4%)     | 3110 (39.4%)        | 1267 (49.6%)     |
| ≥ 30                                                           | 4431 (43.7%)                    | 1842 (47.0%)     | 3709 (47.0%)        | 925 (36.2%)      |
| Charleston Comorbidity Index                                   |                                 |                  |                     |                  |
| 0                                                              | 1718 (17.0%)                    | 649 (16.5%)      | 1703 (21.6%)        | 546 (21.4%)      |
| 1-4                                                            | 5384 (53.9%)                    | 1886 (48.5%)     | 4141 (53.7%)        | 1378 (55.3%)     |
| ≥ 5                                                            | 3031 (30.4%)                    | 1387 (35.7%)     | 2051 (26.6%)        | 630 (25.3%)      |
| Current Smoker                                                 | 595 (5.9%)                      | 252 (6.4%)       | 296 (3.7%)          | 109 (4.3%)       |
| Diabetes                                                       | 4728 (46.7%)                    | 2300 (58.6%)     | 4579 (58.0%)        | 1320 (51.7%)     |
| COPD                                                           | 3777 (37.3%)                    | 1119 (28.5%)     | 1695 (21.5%)        | 546 (21.4%)      |
| PVD                                                            | 1491 (14.7%)                    | 410 (10.5%)      | 732 (9.3%)          | 237 (9.3%)       |
| CKD                                                            | 3251 (32.1%)                    | 1529 (39.0%)     | 2380 (30.1%)        | 758 (29.7%)      |
| WHO                                                            |                                 |                  |                     |                  |
| 2                                                              | 956 (9.4%)                      | 601 (15.3%)      | 884 (11.2%)         | 197 (7.7%)       |
| 3                                                              | 4111 (40.6%)                    | 1609 (41.0%)     | 2951 (37.4%)        | 786 (30.8%)      |
| 4                                                              | 1678 (16.6%)                    | 494 (12.6%)      | 1500 (19.0%)        | 502 (19.7%)      |
| 5                                                              | 1923 (19.0%)                    | 631 (16.1%)      | 1343 (17.0%)        | 446 (17.5%)      |
| 6                                                              | 1445 (14.3%)                    | 578 (14.7%)      | 1203 (15.2%)        | 620 (24.3%)      |
| SpO <sub>2</sub> (%)                                           | 93.5 (6.4)                      | 94.4 (6.6)       | 93.5 (6.4)          | 93.9 (6.4)       |
| Temperature (°C)                                               | 37.3 (0.8)                      | 37.3 (0.8)       | 37.4 (0.8)          | 37.5 (0.9)       |
| Mean Arterial Pressure (mmHg)                                  | 87.4 (16.5)                     | 89.7 (17.6)      | 87.0 (17.9)         | 86.7 (16.7)      |
| Creatinine (mg/dL)                                             | 1.5 (1.4)                       | 2.2 (2.5)        | 1.6 (1.8)           | 1.6 (1.7)        |
| Hemoglobin (g/dL)                                              | 12.4 (2.5)                      | 11.8 (2.5)       | 12.5 (2.5)          | 12.5 (2.5)       |
| Total Bilirubin (mg/dL)                                        | 0.8 (1.1)                       | 0.7 (0.8)        | 0.8 (1.0)           | 0.8 (1.2)        |
| Time (hours) to first SaO <sub>2</sub>                         | 5.9 (1.0)                       | 4.1 (0.9)        | 8.0 (1.4)           | 5.8 (1.2)        |

'Other' combines the following racial categories: Asian, Native American or Alaskan Nat, Hawaiian or Pacific Islander, Other, and Unknown

**eFigure.** Difference between arterial oxygen saturation and pulse oximetry ( $SaO_2 - SpO_2$ ) by race/ethnicity stratified by  $SpO_2$

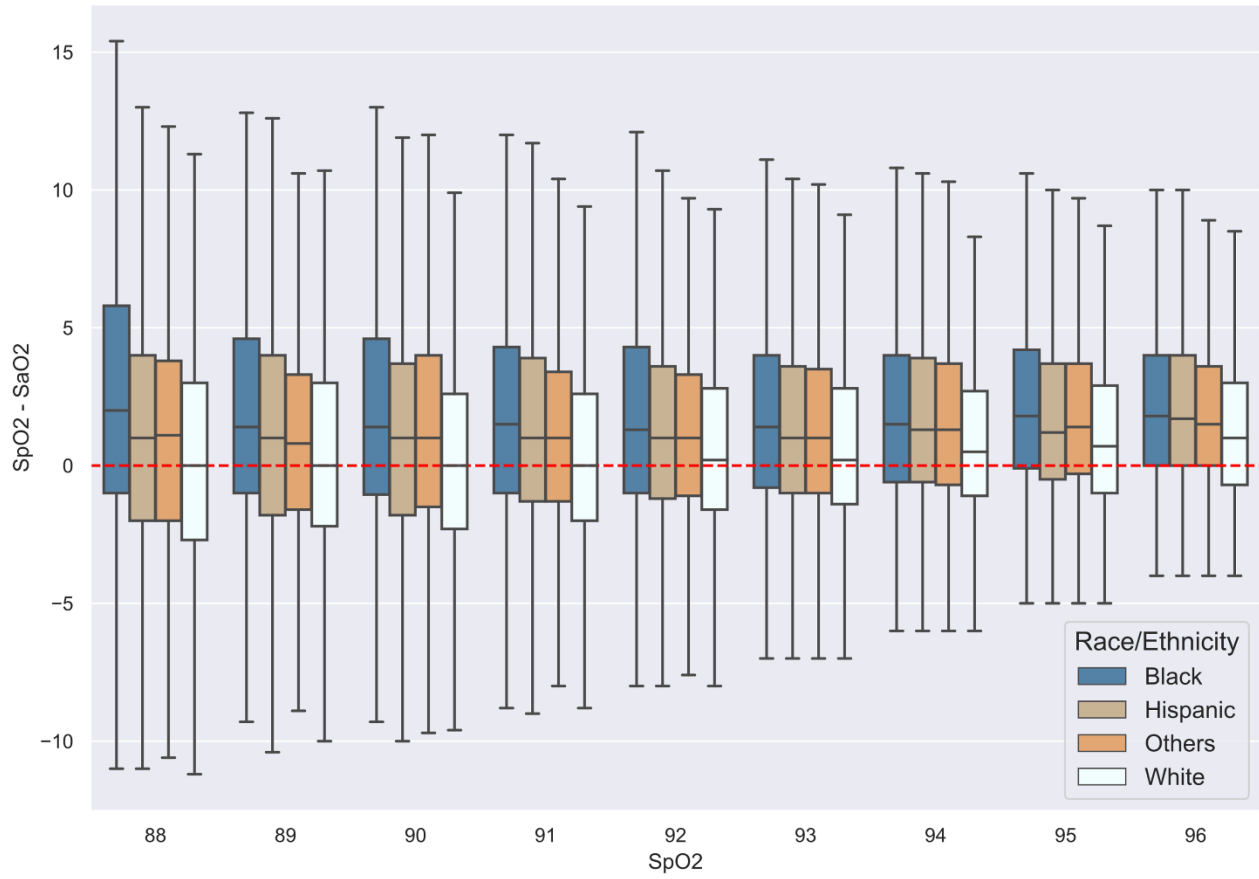

**eTable 3.** Results of the linear mixed model investigating the association between race and pulse oximeter accuracy

| Variable                  | Estimate | Standard Error | p-value  |
|---------------------------|----------|----------------|----------|
| (Intercept)               | -1.88662 | 0.31764        | 3.03E-09 |
| spo2_s                    | -1.57537 | 0.055789       | <1E-10   |
| map_s                     | 0.095282 | 0.035618       | 0.007487 |
| tempc_s                   | 0.022528 | 0.030833       | 0.465039 |
| age                       | -0.00146 | 0.004943       | 0.767047 |
| age_l                     | 0.134988 | 0.138172       | 0.328612 |
| race1Black                | -0.48005 | 0.554643       | 0.386774 |
| race2Hispanic             | 0.169019 | 0.398879       | 0.671765 |
| race3Others               | -0.2974  | 0.575429       | 0.605277 |
| male                      | 0.155765 | 0.08732        | 0.074471 |
| hfnc_or_niv               | 0.174232 | 0.141096       | 0.216892 |
| vent                      | 0.40332  | 0.117437       | 0.000594 |
| creatinine_s              | -0.22967 | 0.051652       | 9.01E-06 |
| bilitot_s                 | -0.38875 | 0.095203       | 5.53E-05 |
| hgb_s                     | 0.346435 | 0.0401         | 6.65E-18 |
| diabetes                  | -0.18157 | 0.097276       | 0.061992 |
| cci1                      | 0.160143 | 0.127512       | 0.209172 |
| cci2                      | 0.026172 | 0.15829        | 0.868677 |
| smoking                   | -0.22437 | 0.188732       | 0.234517 |
| spo2_s:race1Black         | -0.06242 | 0.106279       | 0.557012 |
| spo2_s:race2Hispanic      | 0.166891 | 0.077075       | 0.030386 |
| spo2_s:race3Others        | 0.14813  | 0.11167        | 0.184704 |
| map_s:race1Black          | 0.023393 | 0.066463       | 0.724872 |
| map_s:race2Hispanic       | -0.00031 | 0.049052       | 0.994923 |
| map_s:race3Others         | 0.031002 | 0.06856        | 0.651153 |
| tempc_s:race1Black        | -0.01953 | 0.061581       | 0.751155 |
| tempc_s:race2Hispanic     | -0.05199 | 0.042498       | 0.221257 |
| tempc_s:race3Others       | -0.04608 | 0.058513       | 0.431033 |
| age:race1Black            | -0.00318 | 0.009306       | 0.732412 |
| age:race2Hispanic         | 0.00143  | 0.006655       | 0.8299   |
| age:race3Others           | 0.004303 | 0.009416       | 0.647719 |
| age_l:race1Black          | 0.017153 | 0.267881       | 0.948947 |
| age_l:race2Hispanic       | -0.15646 | 0.1922         | 0.415623 |
| age_l:race3Others         | -0.31207 | 0.273339       | 0.253606 |
| race1Black:male           | 0.020004 | 0.1691         | 0.905832 |
| race2Hispanic:male        | -0.35729 | 0.122736       | 0.003609 |
| race3Others:male          | -0.16571 | 0.177714       | 0.351112 |
| race1Black:hfnc_or_niv    | -0.12601 | 0.281766       | 0.654728 |
| race2Hispanic:hfnc_or_niv | 0.121979 | 0.201775       | 0.545495 |
| race3Others:hfnc_or_niv   | 0.062851 | 0.309599       | 0.83913  |
| race1Black:vent           | -0.07718 | 0.230543       | 0.737807 |
| race2Hispanic:vent        | -0.34821 | 0.164334       | 0.034103 |
| race3Others:vent          | -0.22444 | 0.242187       | 0.354069 |
| race1Black:creatinine_s   | 0.088356 | 0.082402       | 0.283732 |

|                            |          |          |          |
|----------------------------|----------|----------|----------|
| race2Hispanic:creatinine_s | 0.103258 | 0.069249 | 0.136043 |
| race3Others:creatinine_s   | 0.087562 | 0.098698 | 0.375063 |
| race1Black:bilitot_s       | -0.00502 | 0.180268 | 0.977824 |
| race2Hispanic:bilitot_s    | -0.01136 | 0.126441 | 0.92847  |
| race3Others:bilitot_s      | 0.250797 | 0.167025 | 0.134363 |
| race1Black:hgb_s           | 0.077343 | 0.080394 | 0.336045 |
| race2Hispanic:hgb_s        | 0.156007 | 0.055225 | 0.004742 |
| race3Others:hgb_s          | 0.113104 | 0.077163 | 0.142757 |
| race1Black:diabetes        | -0.15199 | 0.203776 | 0.455756 |
| race2Hispanic:diabetes     | 0.128217 | 0.145202 | 0.377245 |
| race3Others:diabetes       | -0.25707 | 0.20368  | 0.206937 |
| race1Black:cci1            | -0.29555 | 0.275147 | 0.282781 |
| race2Hispanic:cci1         | -0.28387 | 0.182825 | 0.120521 |
| race3Others:cci1           | 0.035879 | 0.253776 | 0.887573 |
| race1Black:cci2            | 0.117632 | 0.330089 | 0.721573 |
| race2Hispanic:cci2         | -0.30585 | 0.229625 | 0.182906 |
| race3Others:cci2           | 0.15196  | 0.320844 | 0.635778 |
| race1Black:smoking         | 0.246933 | 0.360171 | 0.492976 |
| race2Hispanic:smoking      | 0.006723 | 0.290339 | 0.981528 |
| race3Others:smoking        | 0.154906 | 0.436574 | 0.722729 |

**eTable 4.** Results of linear mixed models for the association of unrecognized need for COVID-19 therapy with time to COVID-19 therapy and readmissions

|                                        | aHR      | 95% Confidence Interval |
|----------------------------------------|----------|-------------------------|
| <b><i>Time to COVID-19 Therapy</i></b> |          |                         |
| unrecognized                           | 0.90     | 0.83-0.97               |
| raceBlack                              | 0.92     | 0.82-1.03               |
| raceHispanic                           | 1.13     | 1.02-1.25               |
| raceOthers                             | 1.13     | 0.99-1.30               |
| age                                    | 1.00     | 1.00-1.00               |
| Female                                 | 0.99     | 0.92-1.07               |
| bmi                                    | 1.01     | 1.01-1.02               |
| cci1                                   | 0.85     | 0.76-0.96               |
| cci2                                   | 0.630    | 0.55-0.72               |
| <b><i>Readmission</i></b>              |          |                         |
| unrecognized                           | 2.41     | 1.39-4.18               |
| raceBlack                              | 0.689003 | 0.34-1.38               |
| raceHispanic                           | 0.975716 | 0.54-1.75               |
| raceOthers                             | 1.245674 | 0.56-2.79               |
| age                                    | 1.000213 | 0.98-1.02               |
| Female                                 | 1.432148 | 0.89-2.31               |
| who4                                   | 0.343735 | 0.12-0.95               |
| who5                                   | 0.760906 | 0.39-1.50               |
| who6                                   | 0.407724 | 0.21-0.78               |
| bmi                                    | 1.008682 | 0.98-1.04               |
| cci1                                   | 1.159821 | 0.50-2.66               |
| cci2                                   | 1.887592 | 0.80-4.47               |
